# Supplementary material for: Effects of the COVID-19 Pandemic on Individuals with Fibromyalgia – a Systematic Scoping Review Protocol
Source: bioRxiv or medRxiv preprint supplement (doi:10.1101/2023.01.27.23284843), 2023-01-28

## General information

### Study ID

### Title

Title of paper / abstract / report that data are extracted from

### Lead author contact details

### Country in which the study conducted

1.  United States

2.  UK

3.  Canada

4.  Australia

5.  Other

### Notes

## Characteristics of included studies

### Methods

#### Aim of study

#### Study design

|     |                       |                                   |
|-----|-----------------------|-----------------------------------|
| 1.  | <input type="radio"/> | Randomised controlled trial       |
| 2.  | <input type="radio"/> | Non-randomised experimental study |
| 3.  | <input type="radio"/> | Cohort study                      |
| 4.  | <input type="radio"/> | Cross sectional study             |
| 5.  | <input type="radio"/> | Case control study                |
| 6.  | <input type="radio"/> | Systematic review                 |
| 7.  | <input type="radio"/> | Qualitative research              |
| 8.  | <input type="radio"/> | Prevalence study                  |
| 9.  | <input type="radio"/> | Case series                       |
| 10. | <input type="radio"/> | Case report                       |
| 11. | <input type="radio"/> | Diagnostic test accuracy study    |
| 12. | <input type="radio"/> | Clinical prediction rule          |
| 13. | <input type="radio"/> | Economic evaluation               |
| 14. | <input type="radio"/> | Text and opinion                  |
| 15. | <input type="radio"/> | Other                             |

**Date of publication**

|  |
|--|
|  |
|--|

**Dates of study**

|    |                          |                                 |
|----|--------------------------|---------------------------------|
| 1. | <input type="checkbox"/> | Acute (3-5/2020)                |
| 2. | <input type="checkbox"/> | Sub-acute (5-10/2020)           |
| 3. | <input type="checkbox"/> | Prolonged phase of the pandemic |

**Study funding sources**

|  |
|--|
|  |
|--|

**Possible conflicts of interest for study authors**

|  |
|--|
|  |
|--|

**Possible conflicts of interest for study authors**

|    |                       |     |
|----|-----------------------|-----|
| 1. | <input type="radio"/> | No  |
| 2. | <input type="radio"/> | Yes |

3.  Unclear

**Participants**

**Population description**

**Inclusion criteria**

**Exclusion criteria**

**Method of recruitment of participants**

1.  Phone

2.  Mail

3.  Clinic patients

4.  Voluntary

5.  Other

**Total number of participants**

**Pre-pandemic cohort**

1.  Yes

2.  No

**If yes: Same cohort reassessed?**

1.  Yes

2.  No

**Control group**

1.  Yes

2.  No

**Number of control participants**

**Percent of females**

**Fibromyalgia**

**How Fibromyalgia diagnosis was done**

**Questionnaires**

1.  SSS

2.  FIQ

3.  WPI

4.  Other

**Other: name other questionnaires used**

**Baseline Population Characteristics**

|                         | Intervention 1 | Intervention 2 | Overall |
|-------------------------|----------------|----------------|---------|
| <b>Characteristic 1</b> |                |                |         |
| <b>Characteristic 2</b> |                |                |         |
| <b>Characteristic 3</b> |                |                |         |
| <b>Characteristic 4</b> |                |                |         |

**Intervention and Comparisons**

|                         | <b>Intervention 1</b> | <b>Intervention 2</b> |
|-------------------------|-----------------------|-----------------------|
| <b>Characteristic 1</b> |                       |                       |
| <b>Characteristic 2</b> |                       |                       |
| <b>Characteristic 3</b> |                       |                       |
| <b>Characteristic 4</b> |                       |                       |

**Outcome table (Acute period of pandemic)**

|                       | <b>Mean</b> | <b>SD</b> |
|-----------------------|-------------|-----------|
| <b>Intervention 1</b> |             |           |
| <b>Intervention 2</b> |             |           |

**Outcome table (Prolonged period of pandemic)**

|                       | <b>Mean</b> | <b>SD</b> |
|-----------------------|-------------|-----------|
| <b>Intervention 1</b> |             |           |
| <b>Intervention 2</b> |             |           |

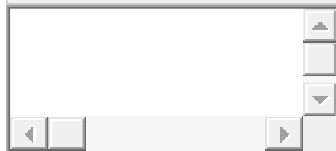

Supplement: Supplementary file [file media-2.pdf]
