# Supplementary material for: Effects of the COVID-19 Pandemic on Individuals with Fibromyalgia – a Systematic Scoping Review Protocol
Source: bioRxiv or medRxiv preprint supplement (doi:10.1101/2023.01.27.23284843), 2023-01-28
Supplement: Supplementary file [file media-1.pdf]

**MUHC Libraries / Bibliothèques CUSM**

|                                                                                                                                                                          |                                                                                                                                                                                                                                                                                                           |
|--------------------------------------------------------------------------------------------------------------------------------------------------------------------------|-----------------------------------------------------------------------------------------------------------------------------------------------------------------------------------------------------------------------------------------------------------------------------------------------------------|
| Literature search                                                                                                                                                        | MGH-1481                                                                                                                                                                                                                                                                                                  |
| Conducted by                                                                                                                                                             | Alex Amar, MLIS                                                                                                                                                                                                                                                                                           |
| At                                                                                                                                                                       | McGill University Health Centre Medical Libraries                                                                                                                                                                                                                                                         |
| For                                                                                                                                                                      | Tali Sahar, MD                                                                                                                                                                                                                                                                                            |
| On the topic of                                                                                                                                                          | COVID-19 in patients with Fibromyalgia                                                                                                                                                                                                                                                                    |
| On                                                                                                                                                                       | 7/5/2022                                                                                                                                                                                                                                                                                                  |
| Delivered on                                                                                                                                                             | 7/6/2022                                                                                                                                                                                                                                                                                                  |
| Notes:                                                                                                                                                                   | COVID search terms modified from Canadian Agency for Drugs and Technologies in Health - <a href="https://covid.cadth.ca/literature-searching-tools/cadth-covid-19-search-strings/">https://covid.cadth.ca/literature-searching-tools/cadth-covid-19-search-strings/</a>                                   |
| Concerning full text access:                                                                                                                                             | Your librarian can assist you in retrieving the full text of articles.<br><br>The MUHC Libraries cover the fees for most interlibrary loans. However, charges may apply for high volume requests or difficult-to-obtain items. You will be informed of any such charges before your request is processed. |
| Please consider providing feedback on this literature search:<br><a href="https://www.surveymonkey.com/r/lit-search-N1">https://www.surveymonkey.com/r/lit-search-N1</a> |                                                                                                                                                                                                                                                                                                           |

## Contents

|                            |                                     |
|----------------------------|-------------------------------------|
| Results.....               | <b>Error! Bookmark not defined.</b> |
| Search Strategies.....     | 2                                   |
| Medline .....              | 2                                   |
| Embase.....                | 3                                   |
| CINAHL .....               | 4                                   |
| PsycInfo.....              | 5                                   |
| Guide to search terms..... | 5                                   |

## Search Strategies

### Medline

| Ovid MEDLINE(R) and Epub Ahead of Print, In-Process, In-Data-Review & Other Non-Indexed Citations and Daily <1946 to July 01, 2022> |                                                                                                                                                                                                                                                              |        |
|-------------------------------------------------------------------------------------------------------------------------------------|--------------------------------------------------------------------------------------------------------------------------------------------------------------------------------------------------------------------------------------------------------------|--------|
| 1                                                                                                                                   | COVID-19/                                                                                                                                                                                                                                                    | 171537 |
| 2                                                                                                                                   | exp COVID-19 Testing/                                                                                                                                                                                                                                        | 9060   |
| 3                                                                                                                                   | exp COVID-19 Vaccines/                                                                                                                                                                                                                                       | 13686  |
| 4                                                                                                                                   | exp SARS-CoV-2/                                                                                                                                                                                                                                              | 130377 |
| 5                                                                                                                                   | (coronavirus/ or betacoronavirus/ or coronavirus infections/) and (disease outbreaks/ or epidemics/ or pandemics/)                                                                                                                                           | 40138  |
| 6                                                                                                                                   | (nCoV* or 2019nCoV or 19nCoV or COVID19* or COVID or SARS-COV-2 or SARSCOV-2 or SARS-COV2 or SARSCOV2 or SARS coronavirus 2 or Severe Acute Respiratory Syndrome Coronavirus 2 or Severe Acute Respiratory Syndrome Corona Virus 2).ti,ab,kf,nm,ot,ox,rx,px. | 261729 |
| 7                                                                                                                                   | ((new or novel or "19" or "2019" or "2020" or Wuhan or Hubei or China or Chinese) adj3 (coronavirus* or corona virus* or betacoronavirus* or CoV or HCoV)).ti,ab,kf,ot.                                                                                      | 72832  |
| 8                                                                                                                                   | (longCOVID* or postCOVID* or postcoronavirus* or postSARS*).ti,ab,kf,ot.                                                                                                                                                                                     | 43     |
| 9                                                                                                                                   | ((coronavirus* or corona virus* or betacoronavirus*) adj3 (pandemic* or epidemic* or outbreak* or crisis)).ti,ab,kf,ot.                                                                                                                                      | 12832  |
| 10                                                                                                                                  | ((Wuhan or Hubei) adj5 pneumonia).ti,ab,kf,ot.                                                                                                                                                                                                               | 398    |
| 11                                                                                                                                  | or/1-10                                                                                                                                                                                                                                                      | 273331 |
| 12                                                                                                                                  | fibromyalg*.tw,kf.                                                                                                                                                                                                                                           | 11840  |
| 13                                                                                                                                  | Fibromyalgia/                                                                                                                                                                                                                                                | 9462   |
| 14                                                                                                                                  | (fibro or fibromyalg*).af.                                                                                                                                                                                                                                   | 19410  |
| 15                                                                                                                                  | or/12-14                                                                                                                                                                                                                                                     | 19410  |
| 16                                                                                                                                  | 11 and 15                                                                                                                                                                                                                                                    | 74     |

## Embase

| Embase <1974 to 2022 July 01> |                                                                                                                                                                                                                                                     |        |
|-------------------------------|-----------------------------------------------------------------------------------------------------------------------------------------------------------------------------------------------------------------------------------------------------|--------|
| 1                             | sars-related coronavirus/                                                                                                                                                                                                                           | 512    |
| 2                             | (coronavirinae/ or betacoronavirus/ or coronavirus infection/) and (epidemic/ or pandemic/)                                                                                                                                                         | 10806  |
| 3                             | (nCoV* or 2019nCoV or 19nCoV or COVID19* or COVID or SARS-COV-2 or SARSCOV-2 or SARS-COV2 or SARSCOV2 or SARS coronavirus 2 or Severe Acute Respiratory Syndrome Coronavirus 2 or Severe Acute Respiratory Syndrome Corona Virus 2).ti,ab,kw,hw,ot. | 282432 |
| 4                             | ((new or novel or "19" or "2019" or Wuhan or Hubei or China or Chinese) adj3 (coronavirus* or corona virus* or betacoronavirus* or CoV or HCoV)).ti,ab,kw,hw,ot.                                                                                    | 245293 |
| 5                             | (longCOVID* or postCOVID* or postcoronavirus* or postSARS*).ti,ab,kw,hw,ot.                                                                                                                                                                         | 118    |
| 6                             | ((coronavirus* or corona virus* or betacoronavirus*) adj3 (pandemic* or epidemic* or outbreak* or crisis)).ti,ab,kw,ot.                                                                                                                             | 14930  |
| 7                             | ((Wuhan or Hubei) adj5 pneumonia).ti,ab,kw,ot.                                                                                                                                                                                                      | 459    |
| 8                             | or/1-7                                                                                                                                                                                                                                              | 305232 |
| 9                             | limit 8 to yr="2019 -Current"                                                                                                                                                                                                                       | 303891 |
| 10                            | (fibro or fibromyalg*).ti,ab,kf,hw,ot,dq.                                                                                                                                                                                                           | 33145  |
| 11                            | fibromyalgia/                                                                                                                                                                                                                                       | 23272  |
| 12                            | or/10-11                                                                                                                                                                                                                                            | 33145  |
| 13                            | 9 and 12                                                                                                                                                                                                                                            | 220    |

## CINAHL

| Tuesday, July 05, 2022 3:30:39 PM |                                                                                                                                                                                                                                                                                                                                                                                                                                                                                      |         |
|-----------------------------------|--------------------------------------------------------------------------------------------------------------------------------------------------------------------------------------------------------------------------------------------------------------------------------------------------------------------------------------------------------------------------------------------------------------------------------------------------------------------------------------|---------|
| S1                                | (MH "COVID-19+") OR (MH "Post-Acute COVID-19 Syndrome") OR (MH "COVID-19 Testing") OR (MH "COVID-19 Vaccines") OR (MH "COVID-19 Pandemic") OR (MH "SARS-CoV-2")                                                                                                                                                                                                                                                                                                                      | 61,378  |
| S2                                | TI ( nCoV* or 2019nCoV or 19nCoV or COVID19* or COVID or SARS-COV-2 or SARSCOV-2 or SARS-COV2 or SARSCOV2 or SARS coronavirus 2 or Severe Acute Respiratory Syndrome Coronavirus 2 or Severe Acute Respiratory Syndrome Corona Virus 2 ) OR AB ( nCoV* or 2019nCoV or 19nCoV or COVID19* or COVID or SARS-COV-2 or SARSCOV-2 or SARS-COV2 or SARSCOV2 or SARS coronavirus 2 or Severe Acute Respiratory Syndrome Coronavirus 2 or Severe Acute Respiratory Syndrome Corona Virus 2 ) | 88,211  |
| S3                                | TI ( ((new or novel or "19" or "2019" or Wuhan or Hubei or China or Chinese) N3 (coronavirus* or corona virus* or betacoronavirus* or CoV or HCoV)) ) OR AB ( ((new or novel or "19" or "2019" or Wuhan or Hubei or China or Chinese) N3 (coronavirus* or corona virus* or betacoronavirus* or CoV or HCoV)) )                                                                                                                                                                       | 15,671  |
| S4                                | TI ( longCOVID* or postCOVID* or postcoronavirus* or postSARS* ) OR AB ( longCOVID* or postCOVID* or postcoronavirus* or postSARS* )                                                                                                                                                                                                                                                                                                                                                 | 11      |
| S5                                | TI ( ((coronavirus* or corona virus* or betacoronavirus*) N3 (pandemic* or epidemic* or outbreak* or crisis)) ) OR AB ( ((coronavirus* or corona virus* or betacoronavirus*) N3 (pandemic* or epidemic* or outbreak* or crisis)) )                                                                                                                                                                                                                                                   | 8,456   |
| S6                                | TI ( ((Wuhan or Hubei) N5 pneumonia) ) OR AB ( ((Wuhan or Hubei) N5 pneumonia) )                                                                                                                                                                                                                                                                                                                                                                                                     | 145     |
| S7                                | S1 OR S2 OR S3 OR S4 OR S5 OR S6                                                                                                                                                                                                                                                                                                                                                                                                                                                     | 103,929 |
| S8                                | (MH "Fibromyalgia")                                                                                                                                                                                                                                                                                                                                                                                                                                                                  | 6,243   |
| S9                                | TI ( fibro or fibromyalg* ) OR AB ( fibro or fibromyalg* )                                                                                                                                                                                                                                                                                                                                                                                                                           | 7,113   |
| S10                               | S8 OR S9                                                                                                                                                                                                                                                                                                                                                                                                                                                                             | 8,321   |
| S11                               | S7 AND S10                                                                                                                                                                                                                                                                                                                                                                                                                                                                           | 22      |

## PsycInfo

| APA PsycInfo <1987 to June Week 4 2022> |                                                                                                                                                                                                                                         |       |
|-----------------------------------------|-----------------------------------------------------------------------------------------------------------------------------------------------------------------------------------------------------------------------------------------|-------|
| 1                                       | exp COVID-19/                                                                                                                                                                                                                           | 10514 |
| 2                                       | exp Coronavirus/                                                                                                                                                                                                                        | 12711 |
| 3                                       | exp Pandemics/                                                                                                                                                                                                                          | 8881  |
| 4                                       | severe acute respiratory syndrome/                                                                                                                                                                                                      | 316   |
| 5                                       | (nCoV* or 2019nCoV or 19nCoV or COVID19* or COVID or SARS-COV-2 or SARSCOV-2 or SARS-COV2 or SARSCOV2 or SARS coronavirus 2 or Severe Acute Respiratory Syndrome Coronavirus 2 or Severe Acute Respiratory Syndrome Corona Virus 2).af. | 24761 |
| 6                                       | ((new or novel or "19" or "2019" or "2020" or Wuhan or Hubei or China or Chinese) adj3 (coronavirus* or corona virus* or betacoronavirus* or CoV or HCoV)).tw,id.                                                                       | 3378  |
| 7                                       | (longCOVID* or postCOVID* or postcoronavirus* or postSARS*).tw,id.                                                                                                                                                                      | 2     |
| 8                                       | ((coronavirus* or corona virus* or betacoronavirus*) adj3 (pandemic* or epidemic* or outbreak* or crisis)).tw,id.                                                                                                                       | 1344  |
| 9                                       | 1 or 2 or 3 or 4 or 5 or 6 or 7 or 8                                                                                                                                                                                                    | 25855 |
| 10                                      | fibromyalgia/                                                                                                                                                                                                                           | 2233  |
| 11                                      | (fibro or fibromyalg*).tw,id.                                                                                                                                                                                                           | 3639  |
| 12                                      | 10 or 11                                                                                                                                                                                                                                | 3663  |
| 13                                      | 9 and 12                                                                                                                                                                                                                                | 7     |

## Guide to search terms

Legends for Medline (Ovid), Embase (Ovid) & CINAHL (Ebsco) are available on our website:

[http://www.muhealthlibraries.ca/Documents/Database\\_Legends.pdf](http://www.muhealthlibraries.ca/Documents/Database_Legends.pdf)
